# Supplementary material for: Cell-Cycle Modulation of Transcription Termination Factor Sen1
Source: PubMed Central journal article supplement (PMC5919780; doi:10.1016/j.molcel.2018.03.010), 2018-04-19
Supplement: mmc1.pdf [file mmc1.pdf]

**Molecular Cell, Volume 70**

**Supplemental Information**

**Cell-Cycle Modulation**

**of Transcription Termination Factor Sen1**

**Hannah E. Mischo, Yujin Chun, Kevin M. Harlen, Brendan M. Smalec, Somdutta Dhir, L. Stirling Churchman, and Stephen Buratowski**

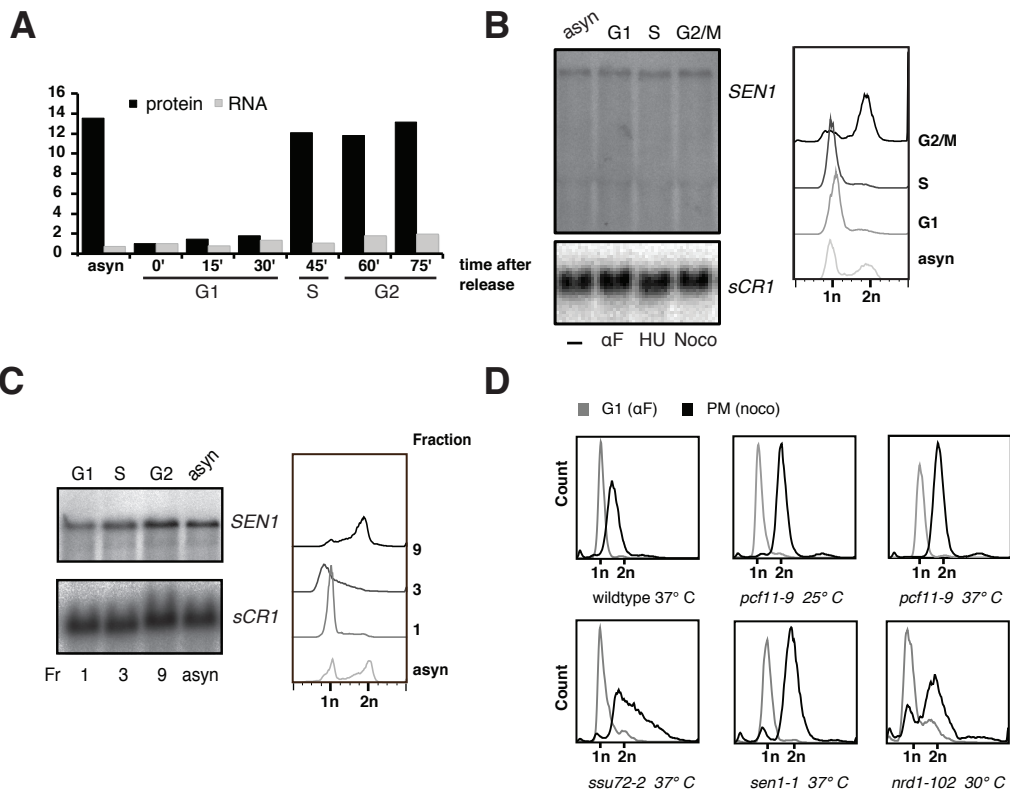

**Figure S1, related to Figure 1:**

**A)** Quantification of Figure 1A and B. Levels were normalised to levels at time of  $\alpha$ -Factor release (0').

**B)** 10  $\mu$ g RNA from arrested wild type cells (as in Figure 1C) was analysed by RNA blot for expression of *SEN1* and *sCR1*.

**C)** 11  $\mu$ g RNA from elutriated cells (as in Figure 1D) was analysed by RNA blot for expression of *SEN1* and *sCR1*.

**D)** FACS profiles for cells analysed by RNA Blot in Figure 1E.

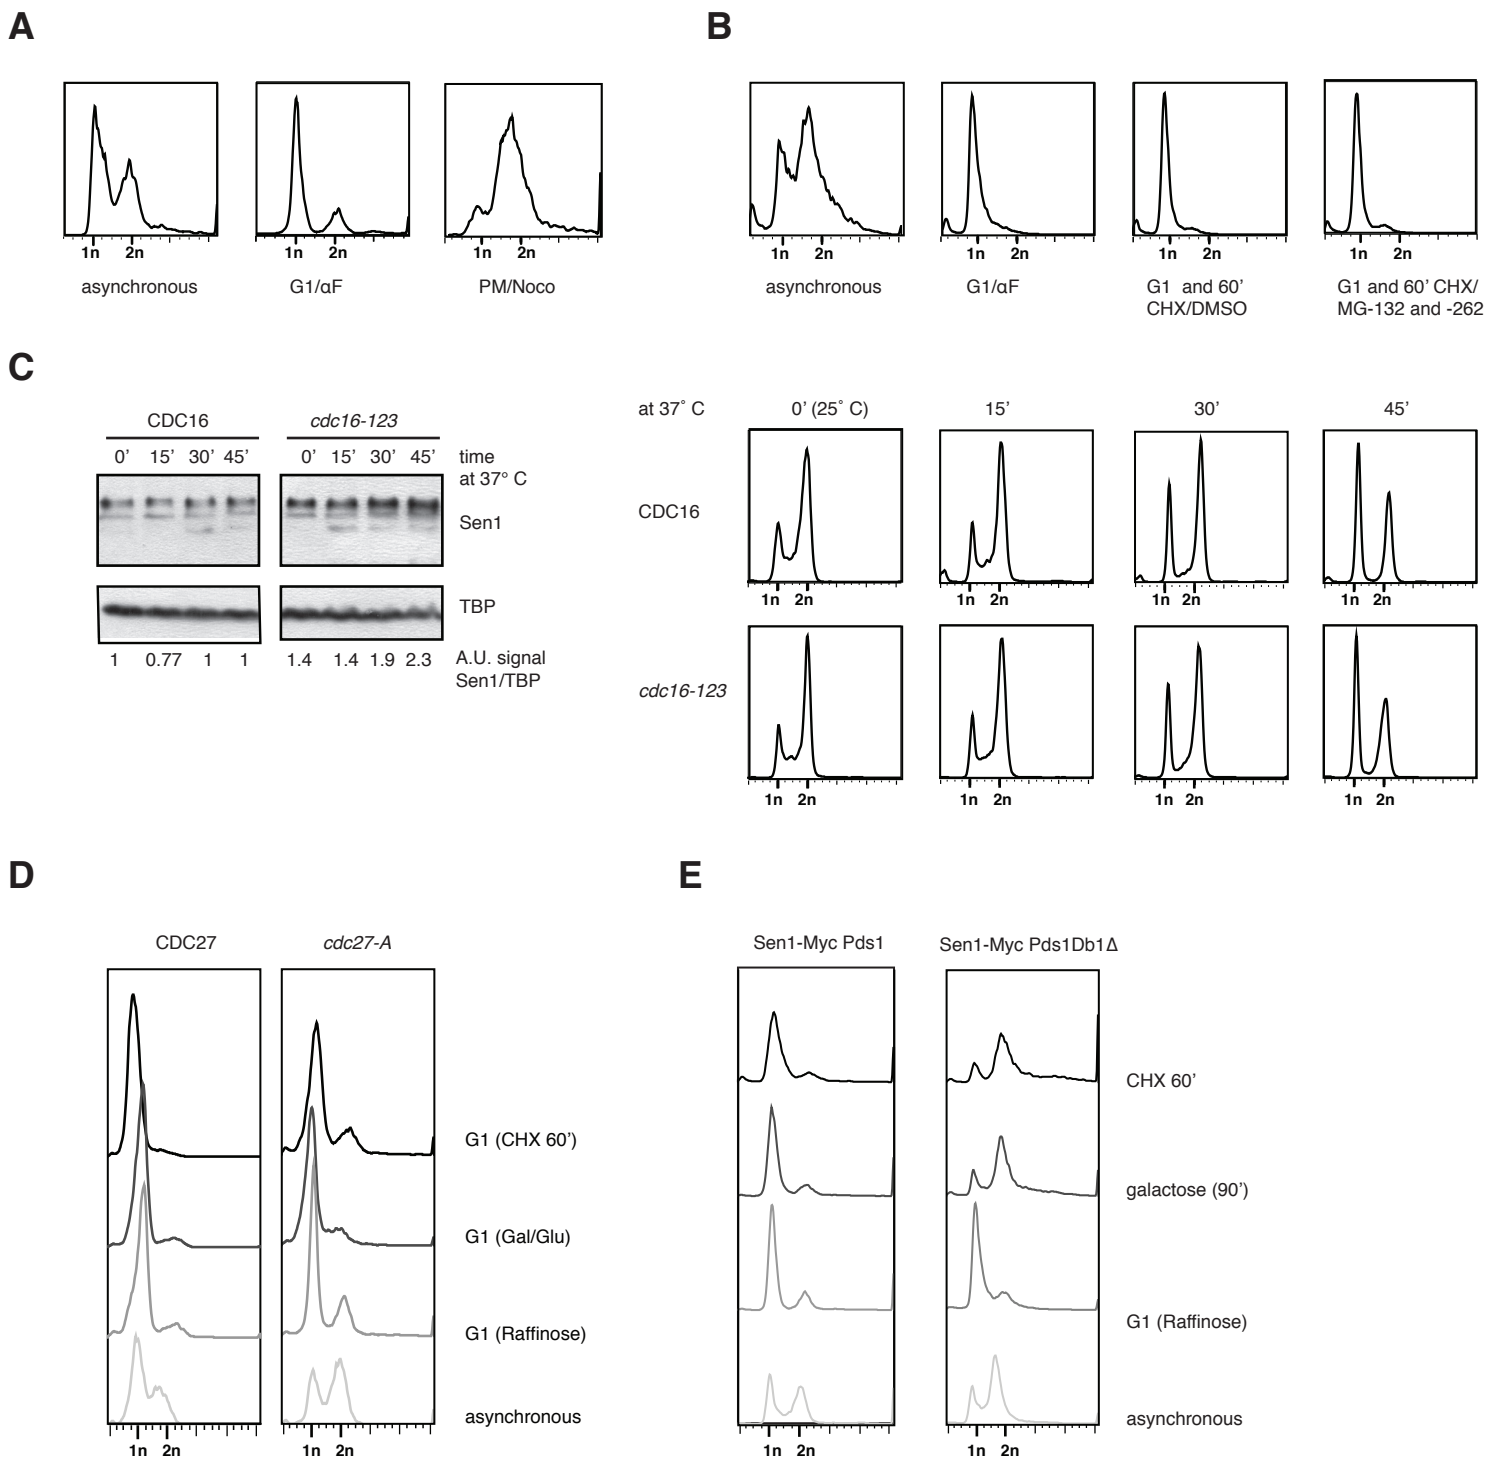

**Figure S2, related to Figure 2:**

**A)** FACS analysis of cells analysed in Figure 2A (asynchronous; cells before experiment,

G1/PM; cells immediately before CHX addition).

**B)** FACS analysis of cells analysed in Figure 2B.

**C)** Sen1 accumulates in the temperature sensitive APC mutant *cdc16-123*. *cdc16-123* and wild type cells were grown in YPD at 25° C and shifted to 37° C for the indicated times. Untagged, endogenous Sen1 levels were analyzed from whole cell extracts and compared by immunoblotting to TBP (left panel), loading 2.1x10<sup>7</sup> cells/lane. Numbers under the lanes denote Sen1 signal intensity in A.U. normalized to TBP signal and to the 0 min time point of the wild type control.

**D)** FACS analysis of cells analysed in Figure 2C.

**E)** FACS analysis of cells analysed in Figure 2E.

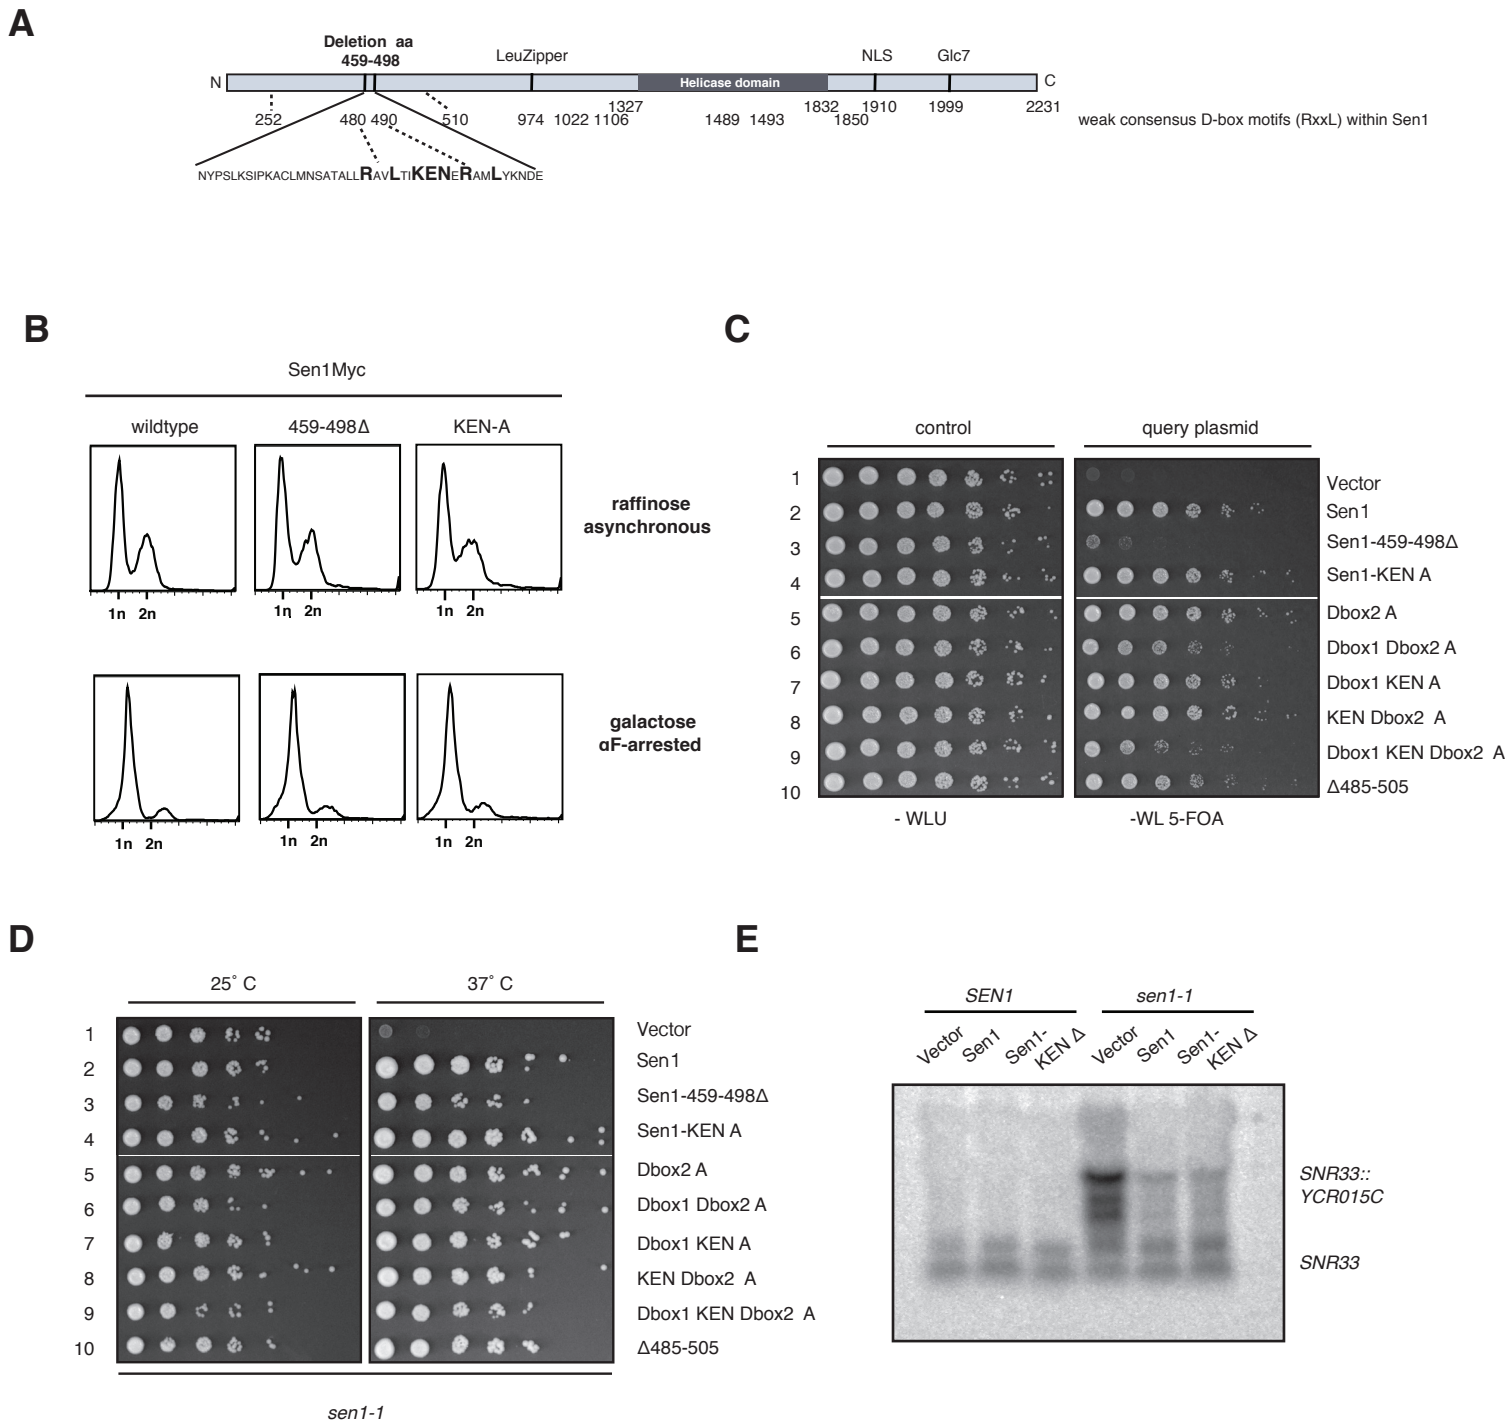

**Figure S3, related to Figure 3:**

**A)** Schematic model of Sen1 domain organization as in Figure 3A. Positions of the weak D-box consensus RxxL is indicated beneath the diagram.

**B)** FACS analysis of cells analysed in Figure 3B.

**C)** Five-fold serial dilutions (starting at  $1.2 \times 10^5$  cells/spot) of *sen1*Δ cells, carrying pRS416 +-700Sen1 and query plasmids 1-11 (left panel) or query plasmids alone (right panel). Query plasmids: 1, Vector; pRS414. 2, Sen1; pRS414+-700Sen1. 3-11 indicated mutant derivatives of pRS414+-Sen1.

**D)** Five-fold serial dilutions (as C) of SEN1 and *sen1-1* cells transformed with centromeric plasmids pRS416 (Vector), and plasmids 1-11 all based on pRS416 +- 700 Sen1 and grown at 37° C.

**E)** RNA blot analysis (1% agarose) of 15 μg RNA isolated from SEN1 or *sen1-1* cells transformed with Vector, pGSen1Myc (Sen1), or pGSen1Myc-459-498Δ (459-498Δ) and induced with galactose for 3 hrs at permissive temperature prior to a 30 min shift to non-permissive temperature. RNA blots were probed against SNR33.

**A**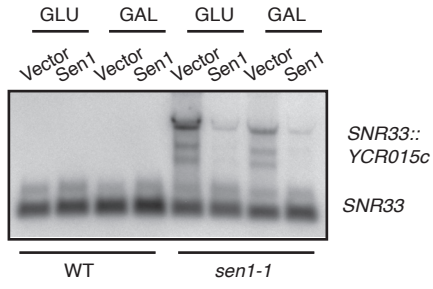**B**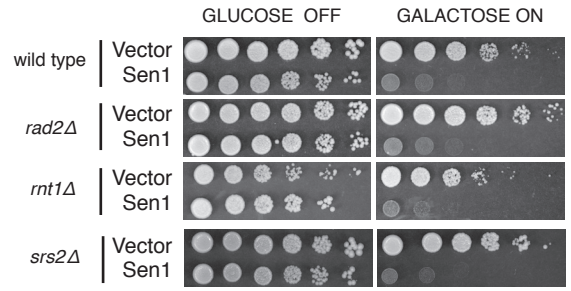**C**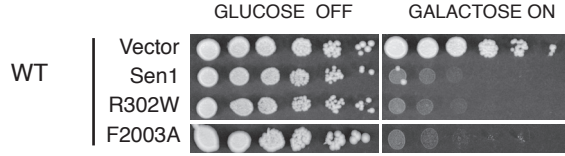**D**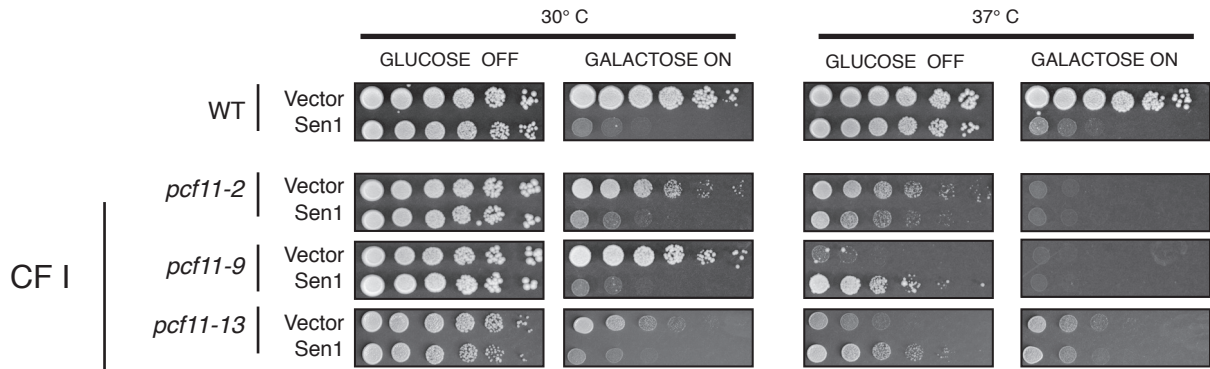**E**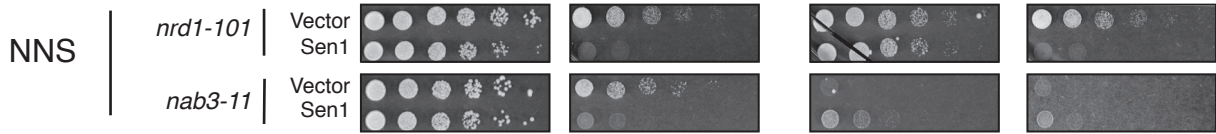**F**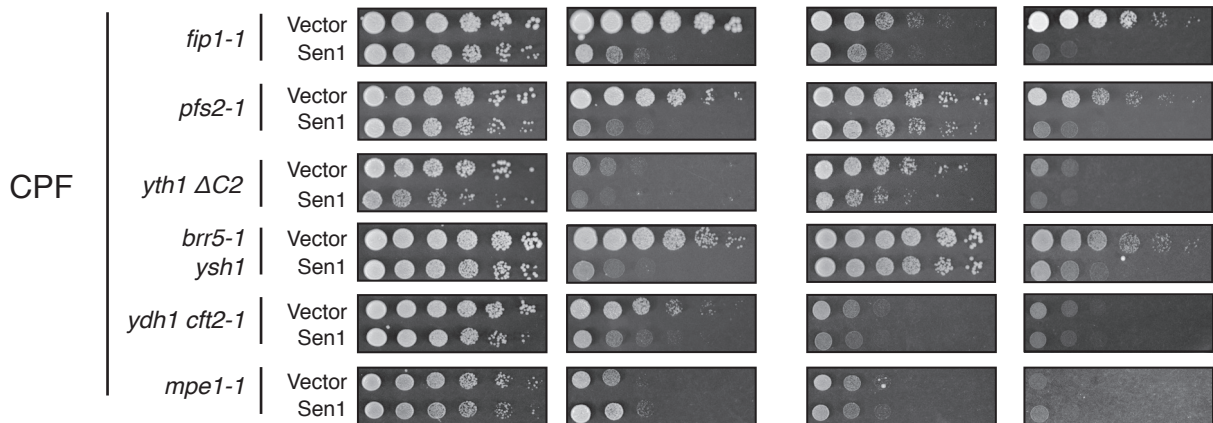**G**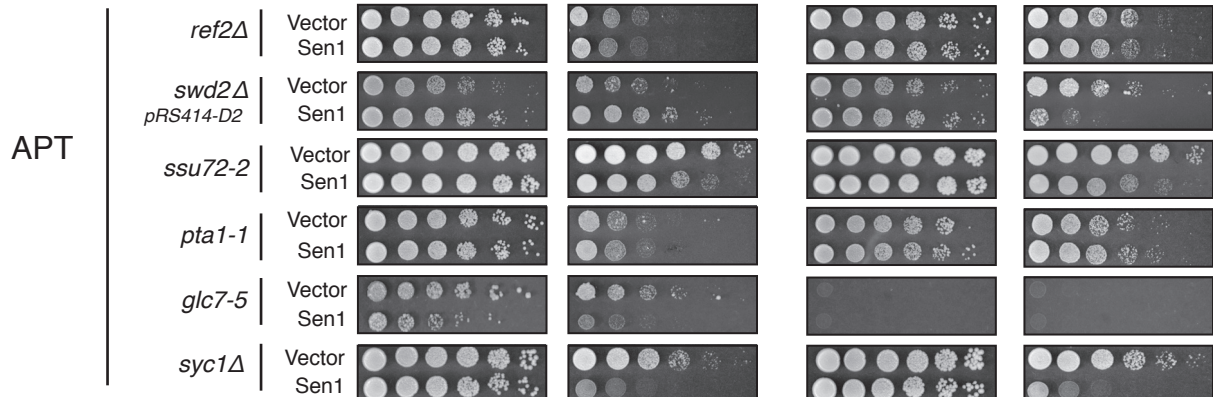

**Figure S4, related to Figure 4:**

**A)** RNA blot analysis of the SNR33 locus. See Figure 4A.

**B)** Serial five-fold dilutions of *rnt1* $\Delta$ , *rad2* $\Delta$ , *srs2* $\Delta$  and wild type cells transformed with Vector, pGSen1Myc, or the point mutations F2003A and R302W introduced into pGSen1Myc (pGSM-F2003A and pGSM-R302W). Growth was observed at 30° C.

**C)** Serial five-fold dilutions of mutants of CFI component Pcf11. *pcf11-2* has defective cleavage activity and consequently defects in mRNA termination, *pcf11-13* has a mutation in the CID and affects snoRNA termination, whereas *pcf11-9* carries mutations that affect both processes (Grant et al., 2011; Sadowski et al., 2003).

Cell growth observed at 30° (semi-permissive) and 37° C (non-permissive temperature).

**E)** Serial five-fold dilutions of the NNS component mutants *nrd1-101* and *nab3-11* starting at a cell density of 12 10<sup>4</sup> cells/spot.

**F)** Serial five-fold dilutions of mutants of CPF components.

**G)** Serial five-fold dilutions of mutants of APT components. SWD2 deletion is only viable in presence of Sen1 aa 1890-2092 containing a Glc7 interaction site and is therefore maintained transformed with pRS414D2 (pRS414 +-700 Sen1 D2) (Nedea et al., 2008).

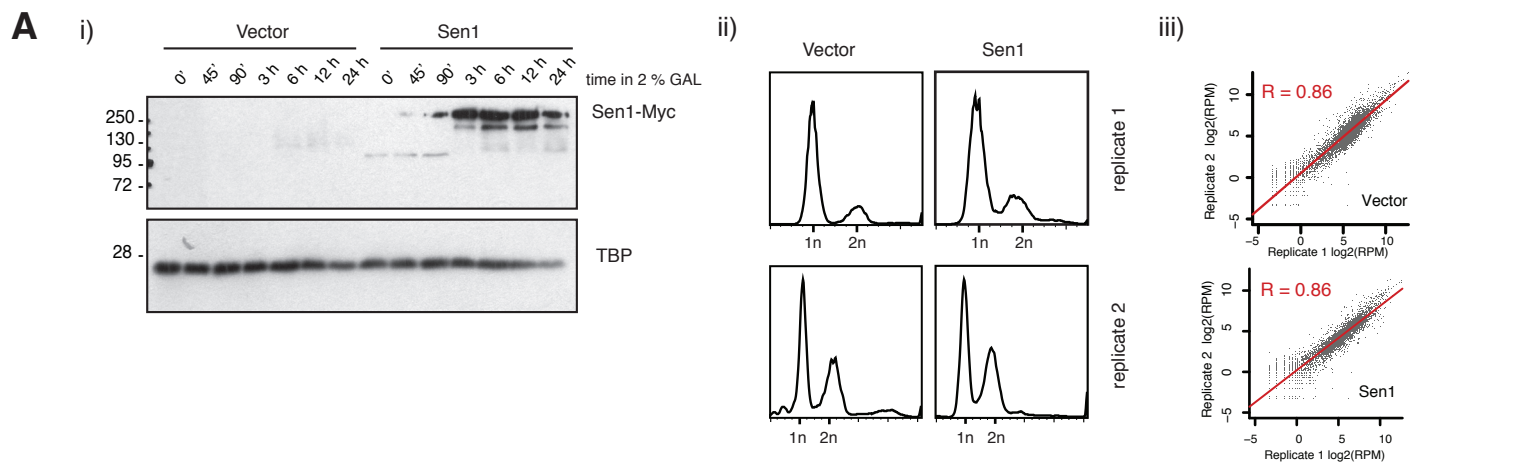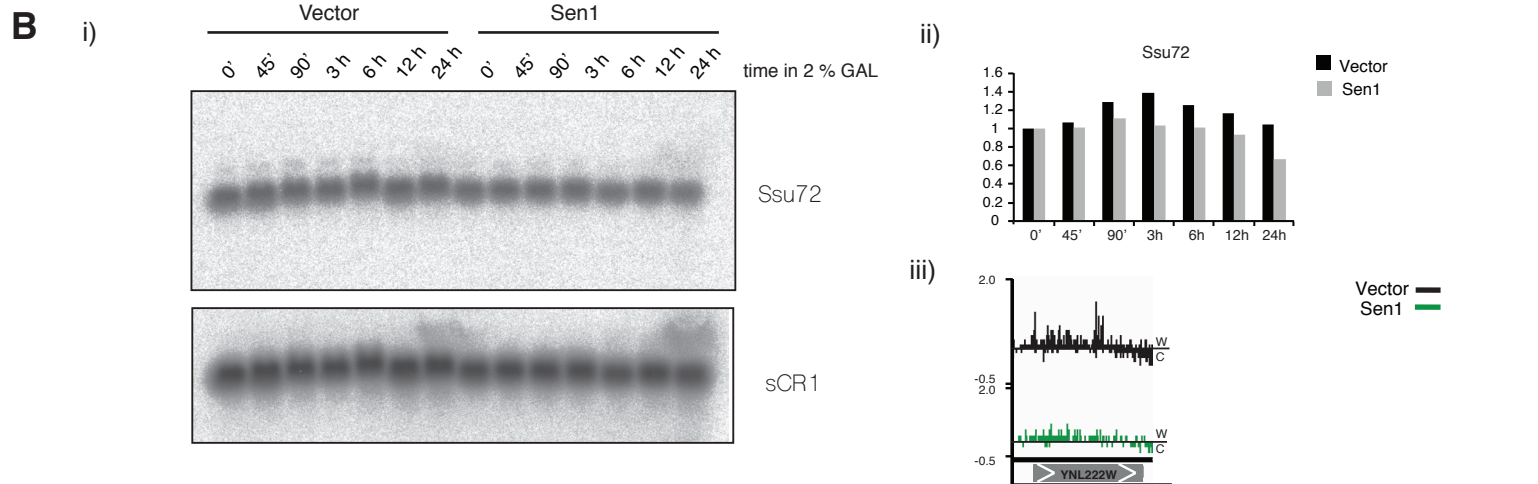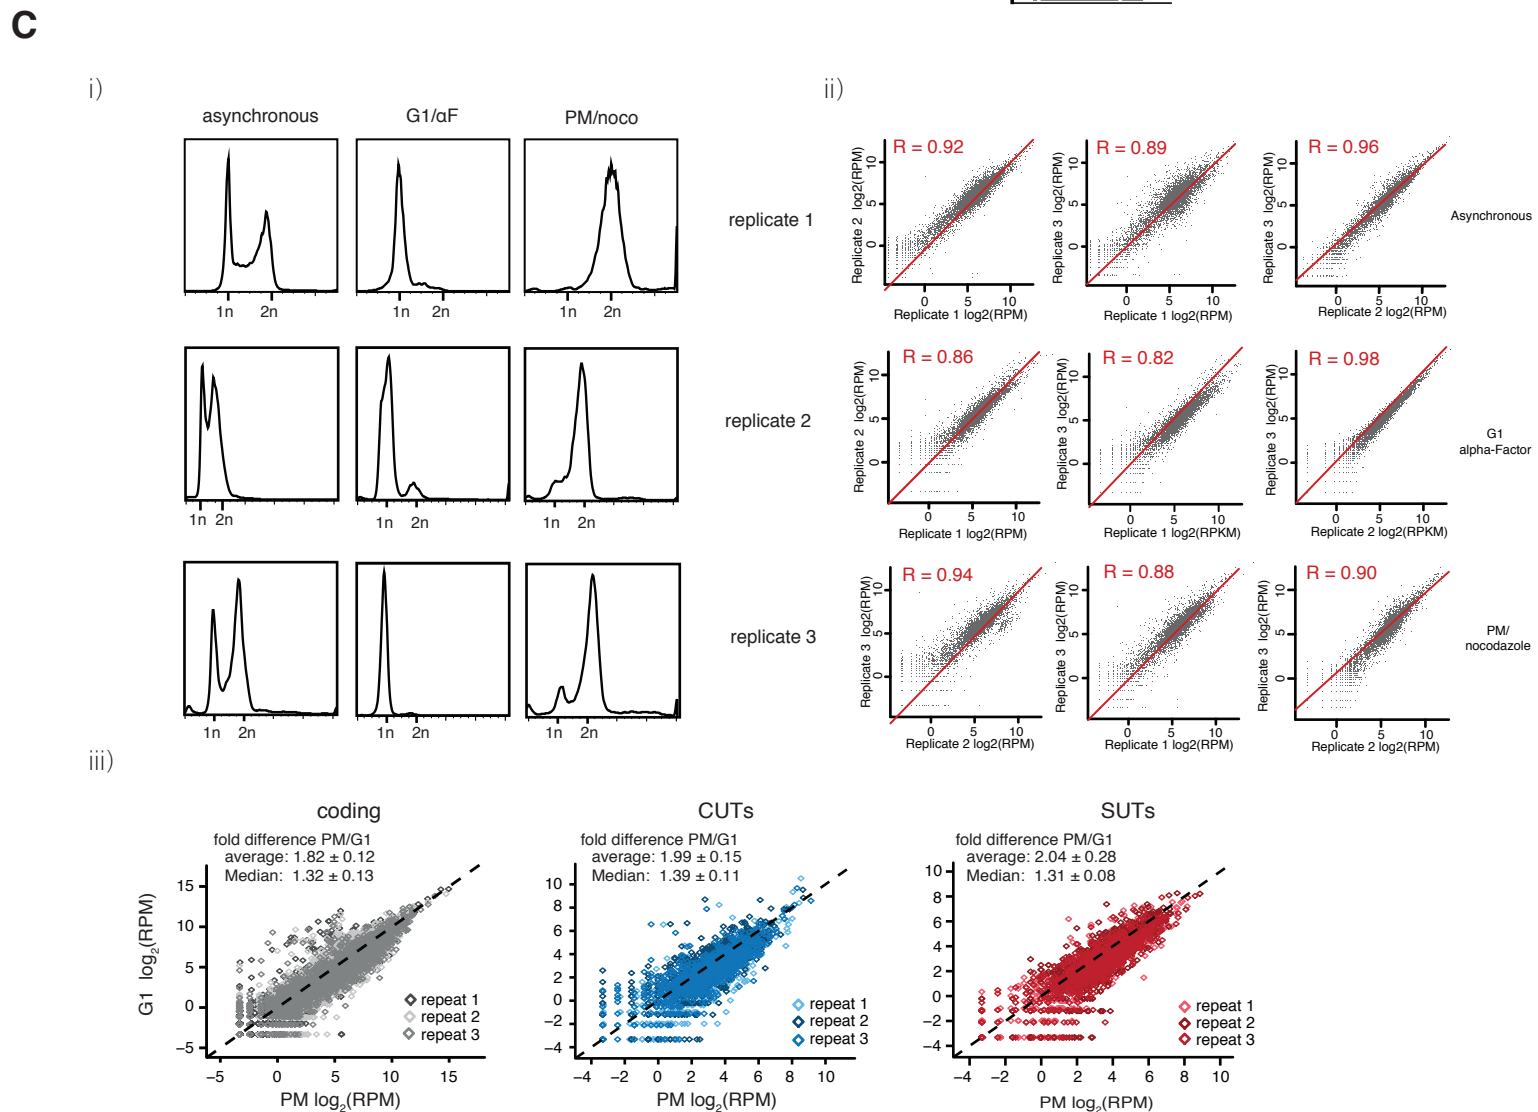

**Figure S5, related to Figure 6:**

- A.i)** Immunoblot of Sen1 expression in cells transformed with Vector or pGSen1Myc and induced for indicated times. Whole cell TCA extracts from approximately  $7 \times 10^6$  cells per lane.
- A.ii)** FACS analysis of Vector or Sen1 expressing cells used in the NETseq analysis. Due to slow growth in minimal media supplemented with raffinose and galactose, cells are mostly found in G1.
- A.iii)** Scatterplots of  $\text{Log}_2(\text{RPM})$  values of replicates 1 and 2 for Sen1 and Vector. R denotes the Pearson correlation coefficient of the respective RPM values.
- B.i)** 15 $\mu\text{g}$  RNA from cells isolated in parallel with protein extracts described in Figure S6A.i, was separated on a 1 % agarose gel, transferred onto nitrocellulose and probed against *SSU72*.
- B.ii)** Quantification of Northern Blot signals relative to *sCRI* and 0 minutes induction.
- B.iii)** NET-seq profiles for *Ssu72* (*YNR222w*) for Vector (black) and Sen1 (green) samples. RPM values for *Ssu72* are 65.9 (Vector) and 25.6 (Sen1).
- C.i)** FACS analysis of asynchronous, G1- ( $\alpha\text{F}$ ) or G2/M- (noco) arrested cells used in the NETseq analysis.
- C.ii)** Scatterplots of  $\text{Log}_2(\text{RPM})$  values of replicates 1-3 for asynchronous,  $\alpha\text{F}$  and nocodazole arrested cells. R denotes the Pearson correlation coefficient of the respective RPM values.
- C.iii)** RPM values for coding (grey, rep1, n=6490; rep2,3 n= 6594), CUTs (blue, n = 924) and SUTs (red, rep1, n=834; rep2,3, n=845) in G1- versus G2-arrested cells depicted as scatterplot.



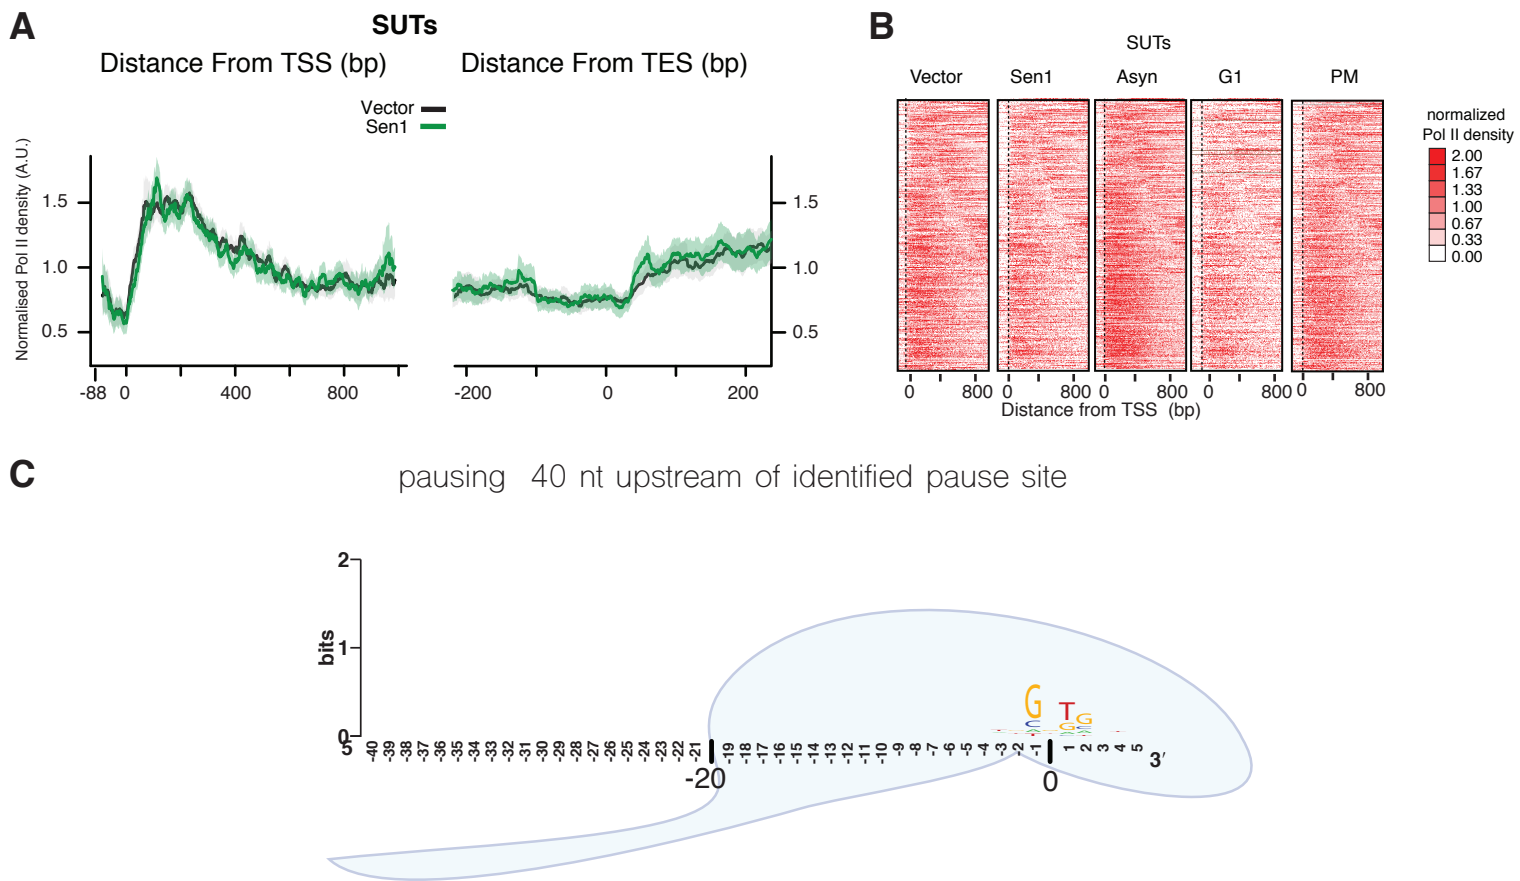

**Figure S6, related to Figure 7:**

- A)** Aggregate plot of all SUTs with an RPKM >10 (n= 847) anchored at the transcription start site (TSS) or the annotated transcription end site (TES).
- B)** Heatmap of all SUTs in Vector or Sen1-expressing cells, as well as asynchronous and G1 arrested cells.
- C)** MEME search of 40 nt upstream of the pause sites identifies no additional motif.

Table S1, related to Key Ressources Table.: Plasmids used in this study

| Name                                      | Backbone                         | Features                                                                                       | Construction                                                                                                      | Reference                         |
|-------------------------------------------|----------------------------------|------------------------------------------------------------------------------------------------|-------------------------------------------------------------------------------------------------------------------|-----------------------------------|
| pYMHHM                                    | pYES<br>(AmpR,<br>2 $\mu$ ,URA3) | 5xMyc-2xTEV-6xHis-<br>MCS-6xHis-2xTEV-<br>5xMyc                                                |                                                                                                                   | Genescript                        |
| pGSen1Myc                                 | pYMHHM                           | BamH1- <i>SEN1</i> -Not1-<br>6xHis-2xTEV-5xMyc                                                 | Codon optimized Sen1<br>sequence inserted into<br>pYMHHM                                                          | Geneart                           |
| pGSM-F2003A                               | pGSen1Myc                        | Point mutation F2003A                                                                          | SDM amplified with<br>hm527                                                                                       | This study                        |
| pGSM-R302W                                | pGSen1Myc                        | Point mutation R302W                                                                           | SDM amplified with<br>Hm529                                                                                       | This study                        |
| pGSM-K1363A                               | pGSen1Myc                        | Point mutation K1363A                                                                          | SDM amplified with<br>hm510                                                                                       | This study                        |
| pGSM-D1590A                               | pGSen1Myc                        | Point mutation<br>D1590A                                                                       | SDM amplified with<br>Hm514                                                                                       | This study                        |
| pGSen1Myc-459-<br>498 $\Delta$            | pGSen1Myc                        | Deletion of 30 aa<br>around KEN-box                                                            | PPL: pGSen1Myc<br>amplified with hm493<br>and hm492                                                               | This study                        |
| pRS416 +-700 Sen1                         | pRS416<br>(AmpR, CEN,<br>URA3)   | Sen1 with 700 nt<br>endogenous promoter<br>and terminator sequence                             | Sen1 +flanking region<br>amplified with hm456<br>and hm457, subcloned<br>into Topo and transferred<br>into pRS416 | This study                        |
| pRS414+-700 Sen1                          | pRS414<br>(AmpR, CEN,<br>TRP1)   | As pRS416 +-700 Sen1                                                                           | As pRS416 +-700 Sen1                                                                                              | This study                        |
| pRS414 +-700<br>Sen1-459-498 $\Delta$     | pRS414 +-700<br>Sen1             | 30aa deletion around<br>KEN-box                                                                | PPL: pRS414+-700Sen1<br>amplified with hm480<br>hm477.                                                            | This study                        |
| pRS414 +-700 Sen1<br>D2                   | pRS414<br>(AmpR, CEN,<br>TRP1)   | aa 689-2231 of Sen1                                                                            | PPL: pRS414+-700Sen1<br>amplified with hm472,<br>hm473                                                            | This study                        |
| pRS414 +-700<br>Sen1-KEN A                | pRS414<br>(AmpR, CEN,<br>TRP1)   | aa K486A,<br>E487A,N488A                                                                       | PPL: pRS414+-700Sen1<br>amplified with 3 and 6                                                                    | This study                        |
| pRS414+-700<br>Sen1-Dbox2 A               | pRS414<br>(AmpR, CEN,<br>TRP1)   | aa R490A, L493A                                                                                | PPL: pRS414+-700Sen1<br>amplified with 3 and 5                                                                    | This study                        |
| pRS414+-700<br>Sen1-Dbox1 Dbox2<br>A      | pRS414<br>(AmpR, CEN,<br>TRP1)   | aa R480A, L483A,<br>R490A, L493A                                                               | PPL: pRS414+-700Sen1<br>amplified with 1 and 5                                                                    | This study                        |
| pRS414+-700<br>Sen1-Dbox1 KEN<br>A        | pRS414<br>(AmpR, CEN,<br>TRP1)   | aa R480A, L483A,<br>K486A, E487A, N488A                                                        | PPL: pRS414+-700Sen1<br>amplified with 1 and 6                                                                    | This study                        |
| pRS414+-700<br>Sen1-KEN Dbox 2<br>A       | pRS414<br>(AmpR, CEN,<br>TRP1)   | aa K486A, E487A,<br>N488A, R490A, L493A                                                        | PPL: pRS414+-700Sen1<br>amplified with 3 and 4                                                                    | This study                        |
| pRS414+-700<br>Sen1-Dbox1 KEN<br>Dbox 2 A | pRS414<br>(AmpR, CEN,<br>TRP1)   | aa R480A, L483A,<br>K486A, E487A,<br>N488A, R490A, L493A                                       | PPL: pRS414+-700Sen1<br>amplified with 1 and 4                                                                    | This study                        |
| pRS414+-700<br>Sen1- $\Delta$ 485-505     | pRS414<br>(AmpR, CEN,<br>TRP1)   | Deletion of aa 485-505<br>comprising KEN and<br>Dbox2.                                         |                                                                                                                   | This study                        |
| P258                                      | YIplac211/Gal1-<br>10            | PDS1 $\Delta$ db, which<br>deletes the destruction<br>box of Pds1 under<br>control of pGAL1-10 |                                                                                                                   | Frank<br>Stegmeier/A<br>Amon lab. |

SDM: site directed mutagenesis

PPL: phosphorylated primer extension and ligation
